# Supplementary material for: Perspectives on Siting Community Pharmacies at Fuel Stations in Nigeria: A Cross- Sectional Survey
Source: Research Square preprint supplement (doi:10.21203/rs.3.rs-8013231/v1), 2025-12-17
Supplement: Supplementary file 2 [file 6b4b56b7948be79bbc99778a.docx]

**Codebook for Data Analysis**

| Code name | Description | Definition | Example Quote | Category/Theme |
| --- | --- | --- | --- | --- |
| First Impression | Actions and behaviours that betray the default bias of respondents | Verbal and non-verbal communication that represent a respondent’s openness to the possibility of the practice innovation | “It will be interesting to see how the stakeholders will receive such an innovation in Nigeria” | General Impression |
| Professional Impact | Practical implications of a possible implementation of the innovation | Evidence of respondent’s considered objective judgement of the likely impact of the innovation on patient safety and professional ethics | “Dispensing of tablets in counting forms should be discouraged in CPs within FSs. All tablets should be dispensed in strips or blister packs, protected from direct exposure to the air” | Impact on Product/Service Quality |
| Global best practices | Evidence of fit with practice norms in other health jurisdictions | Ensuring that the innovation conforms with Good Pharmacy Practice (GPP) guidelines | “I know that CPs are sited within FSs in some other climes such as the United States, United Kingdom, and Saudi Arabia” | Comparison with other Health Systems |
